# Supplementary material
Source: PubMed Central journal article supplement (PMC3497371)
Supplement: AEM.02158-12_zam999103891so1.pdf [file AEM.02158-12_zam999103891so1.pdf]

**Supplemental Table S1.** Grouping of strains in sequence type and allelic profiles.

| Identity <sup>a</sup> | Strain code | ST <sup>b</sup> | Allelic profile at each locus |             |             |            |             |             |
|-----------------------|-------------|-----------------|-------------------------------|-------------|-------------|------------|-------------|-------------|
|                       |             |                 | <i>atpD</i>                   | <i>dnaK</i> | <i>gyrB</i> | <i>ppk</i> | <i>recA</i> | <i>rpoB</i> |
| <i>michiganensis</i>  | CFBP 7439   | 2               | 1                             | 1           | 1           | 3          | 1           | 1           |
| <i>michiganensis</i>  | CFBP 2496   | 2               | 1                             | 1           | 1           | 3          | 1           | 1           |
| <i>michiganensis</i>  | CFBP 2497   | 2               | 1                             | 1           | 1           | 3          | 1           | 1           |
| <i>michiganensis</i>  | CFBP 2499   | 2               | 1                             | 1           | 1           | 3          | 1           | 1           |
| <i>michiganensis</i>  | CFBP 2501   | 2               | 1                             | 1           | 1           | 3          | 1           | 1           |
| <i>michiganensis</i>  | CFBP 7506   | 2               | 1                             | 1           | 1           | 3          | 1           | 1           |
| <i>michiganensis</i>  | CFBP 2495   | 3               | 1                             | 1           | 1           | 3          | 1           | 17          |
| <i>michiganensis</i>  | CFBP 7590   | 4               | 1                             | 1           | 2           | 1          | 1           | 3           |
| <i>michiganensis</i>  | CFBP 7591   | 4               | 1                             | 1           | 2           | 1          | 1           | 3           |
| <i>michiganensis</i>  | CFBP 7599   | 5               | 1                             | 2           | 1           | 5          | 2           | 3           |
| <i>michiganensis</i>  | NCPPB 382   | 6               | 1                             | 2           | 4           | 3          | 2           | 3           |
| <i>michiganensis</i>  | CFBP 7567   | 7               | 1                             | 2           | 7           | 4          | 1           | 1           |
| <i>michiganensis</i>  | CFBP 7568   | 7               | 1                             | 2           | 7           | 4          | 1           | 1           |

|                      |            |    |   |   |   |    |    |   |
|----------------------|------------|----|---|---|---|----|----|---|
| <i>michiganensis</i> | CFBP 1465  | 8  | 1 | 2 | 7 | 4  | 2  | 1 |
| <i>michiganensis</i> | CFBP 1714  | 8  | 1 | 2 | 7 | 4  | 2  | 1 |
| <i>michiganensis</i> | CFBP 7487  | 8  | 1 | 2 | 7 | 4  | 2  | 1 |
| <i>michiganensis</i> | CFBP 7488  | 8  | 1 | 2 | 7 | 4  | 2  | 1 |
| <i>michiganensis</i> | CFBP 1462  | 9  | 1 | 2 | 7 | 23 | 2  | 1 |
| <i>michiganensis</i> | CFBP 2108  | 9  | 1 | 2 | 7 | 23 | 2  | 1 |
| <i>michiganensis</i> | CFBP 2500  | 9  | 1 | 2 | 7 | 23 | 2  | 1 |
| <i>michiganensis</i> | CFBP 7311  | 10 | 1 | 6 | 7 | 4  | 2  | 1 |
| <i>michiganensis</i> | CFBP 7478  | 10 | 1 | 6 | 7 | 4  | 2  | 1 |
| <i>michiganensis</i> | CFBP 7508  | 10 | 1 | 6 | 7 | 4  | 2  | 1 |
| <i>michiganensis</i> | CFBP 7559  | 10 | 1 | 6 | 7 | 4  | 2  | 1 |
| <i>michiganensis</i> | CFBP 7572  | 10 | 1 | 6 | 7 | 4  | 2  | 1 |
| <i>michiganensis</i> | NCPFB 1064 | 10 | 1 | 6 | 7 | 4  | 2  | 1 |
| <i>michiganensis</i> | CFBP 5     | 11 | 1 | 6 | 7 | 4  | 19 | 1 |
| <i>michiganensis</i> | CFBP 5842  | 11 | 1 | 6 | 7 | 4  | 19 | 1 |
| <i>michiganensis</i> | CFBP 7318  | 11 | 1 | 6 | 7 | 4  | 19 | 1 |
| <i>michiganensis</i> | CFBP 7471  | 11 | 1 | 6 | 7 | 4  | 19 | 1 |

|                      |           |    |   |    |   |    |    |    |
|----------------------|-----------|----|---|----|---|----|----|----|
| <i>michiganensis</i> | CFBP 1940 | 12 | 1 | 6  | 7 | 4  | 19 | 16 |
| <i>michiganensis</i> | CFBP 7562 | 14 | 1 | 7  | 2 | 10 | 9  | 1  |
| <i>michiganensis</i> | CFBP 7578 | 14 | 1 | 7  | 2 | 10 | 9  | 1  |
| <i>michiganensis</i> | CFBP 7569 | 15 | 1 | 8  | 2 | 3  | 1  | 1  |
| <i>michiganensis</i> | CFBP 7574 | 15 | 1 | 8  | 2 | 3  | 1  | 1  |
| (saprophyte)         | CFBP 7576 | 16 | 1 | 10 | 9 | 12 | 11 | 7  |
| <i>michiganensis</i> | CFBP 7312 | 17 | 1 | 20 | 1 | 6  | 1  | 3  |
| <i>michiganensis</i> | CFBP 7589 | 19 | 2 | 2  | 1 | 1  | 2  | 3  |
| <i>michiganensis</i> | CFBP 2492 | 19 | 2 | 2  | 1 | 1  | 2  | 3  |
| <i>michiganensis</i> | CFBP 2494 | 19 | 2 | 2  | 1 | 1  | 2  | 3  |
| <i>michiganensis</i> | CFBP 2498 | 19 | 2 | 2  | 1 | 1  | 2  | 3  |
| <i>michiganensis</i> | CFBP 6885 | 19 | 2 | 2  | 1 | 1  | 2  | 3  |
| <i>michiganensis</i> | CFBP 7315 | 19 | 2 | 2  | 1 | 1  | 2  | 3  |
| <i>michiganensis</i> | CFBP 7444 | 19 | 2 | 2  | 1 | 1  | 2  | 3  |
| <i>michiganensis</i> | CFBP 7449 | 19 | 2 | 2  | 1 | 1  | 2  | 3  |
| <i>michiganensis</i> | CFBP 7584 | 19 | 2 | 2  | 1 | 1  | 2  | 3  |
| <i>michiganensis</i> | CFBP 7606 | 19 | 2 | 2  | 1 | 1  | 2  | 3  |

|                      |           |    |   |    |    |    |   |    |
|----------------------|-----------|----|---|----|----|----|---|----|
| <i>michiganensis</i> | CFBP 7504 | 20 | 2 | 2  | 1  | 16 | 2 | 3  |
| <i>michiganensis</i> | CFBP 7158 | 21 | 3 | 1  | 4  | 4  | 5 | 3  |
| <i>michiganensis</i> | CFBP 7594 | 22 | 3 | 3  | 3  | 2  | 3 | 3  |
| <i>michiganensis</i> | CFBP 1460 | 23 | 3 | 6  | 7  | 3  | 2 | 16 |
| <i>michiganensis</i> | CFBP 1461 | 23 | 3 | 6  | 7  | 3  | 2 | 16 |
| <i>michiganensis</i> | CFBP 1463 | 23 | 3 | 6  | 7  | 3  | 2 | 16 |
| <i>michiganensis</i> | CFBP 1464 | 23 | 3 | 6  | 7  | 3  | 2 | 16 |
| <i>michiganensis</i> | CFBP 5843 | 24 | 3 | 21 | 2  | 3  | 2 | 1  |
| <i>michiganensis</i> | CFBP 7555 | 25 | 4 | 1  | 1  | 1  | 2 | 3  |
| <i>michiganensis</i> | CFBP 7597 | 26 | 4 | 1  | 1  | 3  | 4 | 3  |
| <i>michiganensis</i> | CFBP 4999 | 27 | 4 | 1  | 18 | 21 | 2 | 3  |
| <i>michiganensis</i> | CFBP 7314 | 27 | 4 | 1  | 18 | 21 | 2 | 3  |
| <i>michiganensis</i> | CFBP 7309 | 28 | 4 | 1  | 18 | 21 | 2 | 15 |
| <i>michiganensis</i> | CFBP 7310 | 28 | 4 | 1  | 18 | 21 | 2 | 15 |
| <i>michiganensis</i> | CFBP 7316 | 28 | 4 | 1  | 18 | 21 | 2 | 15 |
| <i>michiganensis</i> | CFBP 7317 | 30 | 4 | 2  | 1  | 9  | 2 | 3  |
| <i>michiganensis</i> | CFBP 7551 | 31 | 5 | 1  | 2  | 6  | 6 | 3  |

|                      |            |    |    |    |    |    |    |    |
|----------------------|------------|----|----|----|----|----|----|----|
| <i>michiganensis</i> | CFBP 7507  | 32 | 5  | 16 | 2  | 6  | 6  | 3  |
| <i>insidious</i>     | CFBP 2404  | 33 | 6  | 4  | 5  | 7  | 7  | 4  |
| <i>insidiosus</i>    | CFBP 6488  | 33 | 6  | 4  | 5  | 7  | 7  | 4  |
| <i>insidious</i>     | CFBP 6492  | 33 | 6  | 4  | 5  | 7  | 7  | 4  |
| <i>nebraskensis</i>  | CFBP 2405  | 34 | 7  | 5  | 6  | 8  | 8  | 5  |
| <i>nebraskensis</i>  | CFBP 7553  | 34 | 7  | 5  | 6  | 8  | 8  | 5  |
| <i>michiganensis</i> | CFBP 7586  | 35 | 8  | 1  | 1  | 9  | 19 | 1  |
| <i>michiganensis</i> | CFBP 7464  | 36 | 8  | 1  | 1  | 9  | 19 | 3  |
| <i>michiganensis</i> | NCPPB 2034 | 37 | 8  | 2  | 1  | 9  | 2  | 3  |
| (saprophyte)         | CFBP 7575  | 38 | 9  | 9  | 8  | 11 | 10 | 6  |
| (saprophyte)         | CFBP 7500  | 39 | 9  | 9  | 8  | 11 | 10 | 11 |
| (saprophyte)         | CFBP 7492  | 40 | 9  | 13 | 13 | 15 | 14 | 10 |
| (saprophyte)         | CFBP 7495  | 41 | 9  | 14 | 8  | 1  | 10 | 11 |
| (unknown)            | CFBP 7577  | 42 | 10 | 5  | 10 | 8  | 8  | 5  |
| <i>nebraskensis</i>  | CFBP 3521  | 43 | 10 | 17 | 10 | 8  | 8  | 5  |
| <i>sepedonicus</i>   | CFBP 3559  | 44 | 11 | 11 | 11 | 13 | 12 | 4  |
| <i>sepedonicus</i>   | CFBP 2049  | 45 | 11 | 11 | 11 | 13 | 12 | 8  |

|                      |           |    |    |    |    |    |    |    |
|----------------------|-----------|----|----|----|----|----|----|----|
| <i>sepedonicus</i>   | CFBP 3560 | 46 | 11 | 11 | 11 | 13 | 12 | 13 |
| <i>tesselarius</i>   | CFBP 3496 | 47 | 12 | 12 | 12 | 14 | 13 | 9  |
| (saprophyte)         | CFBP 7505 | 48 | 13 | 15 | 14 | 17 | 15 | 12 |
| <i>tesselarius</i>   | CFBP 3494 | 49 | 14 | 18 | 15 | 18 | 16 | 9  |
| <i>tesselarius</i>   | CFBP 3499 | 50 | 15 | 18 | 16 | 19 | 17 | 9  |
| <i>R. iranicus</i>   | CFBP 807  | 51 | 16 | 19 | 17 | 20 | 18 | 14 |
| <i>michiganensis</i> | CFBP 7313 | 52 | 17 | 20 | 2  | 3  | 4  | 7  |
| <i>michiganensis</i> | CFBP 2493 | 53 | 18 | 2  | 20 | 1  | 2  | 18 |

<sup>a</sup>Subspecies of *C. michiganensis* unless otherwise stated. For the *C. michiganensis* saprophytic strains (saprophyte) is indicated. For the *C. michiganensis* isolated from maize “unknown” is indicated.

<sup>b</sup>Sequence type.
