# Supplementary material
Source: PubMed Central journal article supplement (PMC3497371)
Supplement: AEM.02158-12_zam999103891so2.pdf [file AEM.02158-12_zam999103891so2.pdf]

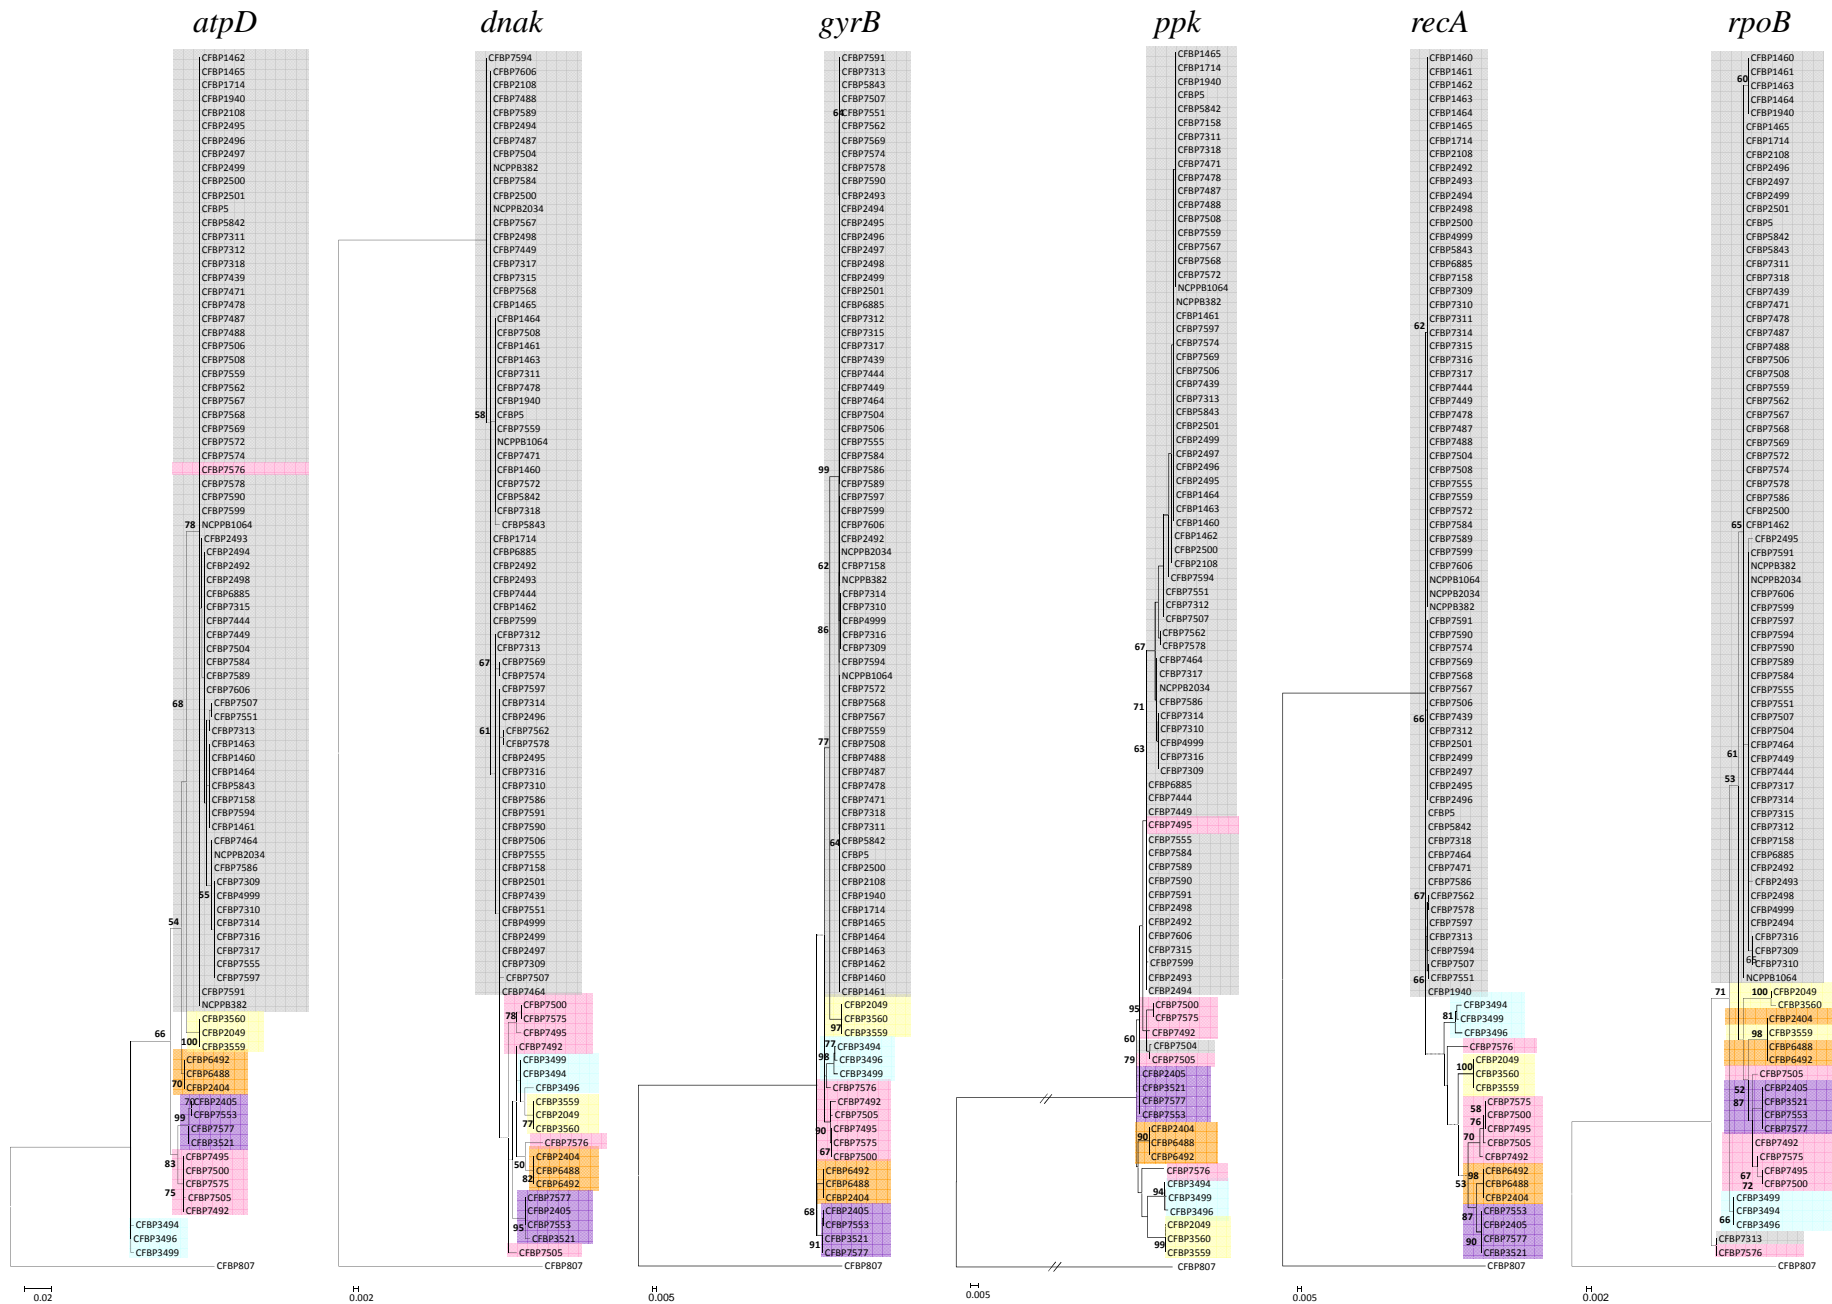

**Supplemental Figure 1.** ML trees based on partial sequences of *atpD*, *dnaK*, *gyrB*, *ppk*, *recA* and *rpoB*. The 1000 bootstrap scores are displayed at each node. Strains of the *insidiosus*, *michiganensis*, *nebraskensis*, *sepedonicus*, and *tessellarius* from *C. michiganensis* are highlighted in orange, grey, purple, yellow and blue, respectively. Saprophytes are in highlighted in pink.
